# Supplementary material for: Reduced age-associated brain changes in expert meditators: a multimodal neuroimaging pilot study
Source: PubMed Central journal article supplement (PMC5578985; doi:10.1038/s41598-017-07764-x), 2017-08-31
Supplement: 41598_2017_7764_MOESM1_ESM.pdf [file 41598_2017_7764_MOESM1_ESM.pdf]

# **Reduced age-associated brain changes in expert meditators: a multimodal neuroimaging pilot study**

Gaël Chételat, Florence Mézenge, Clémence Tomadesso, Brigitte Landeau, Eider Arenaza-Urquijo, Géraldine Rauchs, Claire André, Robin de Flores, Stéphanie Egret, Julie Gonneaud, Géraldine Poisnel, Anne Chocat, Anne Quillard, Béatrice Desgranges, Jean-Gérard Bloch, Matthieu Ricard, Antoine Lutz

**Supplementary Information**

**Supplementary Table S1.** Neuropsychological, lifestyle, sleep and hippocampal volume data in the expert-meditators and elderly control samples.

|                                  | Elderly controls |                 | Expert meditators | Mann-Whitney p-value | ANCOVA p-value |
|----------------------------------|------------------|-----------------|-------------------|----------------------|----------------|
|                                  | n                | Mean $\pm$ SD   | Mean $\pm$ SD     |                      |                |
| <i>Neuropsychological scores</i> |                  |                 |                   |                      |                |
| Fluency                          | 67               | 55.9 $\pm$ 14.3 | 62.5 $\pm$ 12.7   | 0.3                  | 0.9            |
| Memory                           | 67               | 16.5 $\pm$ 4.2  | 20.3 $\pm$ 3.3    | <b>0.02</b>          | 0.2            |
| Span forward                     | 66               | 6.0 $\pm$ 1.2   | 6.7 $\pm$ 1.6     | 0.4                  | 0.6            |
| Span backward                    | 66               | 4.8 $\pm$ 1.2   | 5.2 $\pm$ 1.2     | 0.3                  | 0.6            |
| Processing speed (TMT A sec)     | 66               | 39.0 $\pm$ 11.7 | 34.3 $\pm$ 8.5    | 0.4                  | 0.6            |
| Executive functions (TMT B-A)    | 66               | 45.8 $\pm$ 19.2 | 40.0 $\pm$ 19.2   | 0.6                  | 0.7            |
| <i>Lifestyle measures</i>        |                  |                 |                   |                      |                |
| Mental activity ( $\leq$ 30 yrs) | 43               | 19.0 $\pm$ 4.7  | 25.0 $\pm$ 4.5    | <b><u>0.008</u></b>  | 0.05           |
| Lifelong occupation              | 43               | 44.5 $\pm$ 13.7 | 57.3 $\pm$ 6.0    | <b>0.01</b>          | 0.3            |
| Mental activity (30-65 yrs)      | 43               | 19.0 $\pm$ 5.0  | 24.2 $\pm$ 2.9    | <b>0.01</b>          | 0.2            |
| Diet                             | 43               | 6.0 $\pm$ 2.1   | 8.3 $\pm$ 2.1     | <b>0.02</b>          | <b>0.01</b>    |
| <i>Sleep measures</i>            |                  |                 |                   |                      |                |
| Sleep quality                    | 51               | 4.2 $\pm$ 1.1   | 5.0 $\pm$ 0.9     | 0.1                  | 0.2            |
| Sleep latency (min.)             | 51               | 19.1 $\pm$ 17.4 | 10.3 $\pm$ 7.9    | 0.2                  | 0.3            |
| Sleep duration (hours)           | 51               | 7.0 $\pm$ 1.1   | 6.9 $\pm$ 1.2     | 0.8                  | 0.4            |
| Number of awakenings             | 50               | 1.7 $\pm$ 1.2   | 1.0 $\pm$ 0.6     | 0.1                  | 0.3            |
| Duration of awakenings (min.)    | 51               | 34.7 $\pm$ 33.9 | 5.0 $\pm$ 3.2     | <b><u>0.009</u></b>  | <b>0.03</b>    |
| <i>Hippocampus volume</i>        |                  |                 |                   |                      |                |
| Entire hippocampus               | 53               | 3.21 $\pm$ 0.31 | 3.44 $\pm$ 0.28   | 0.09                 | 0.07           |
| CA1                              | 53               | 1.02 $\pm$ 0.16 | 1.16 $\pm$ 0.13   | <b>0.04</b>          | <b>0.03</b>    |
| Subiculum                        | 53               | 0.97 $\pm$ 0.12 | 1.06 $\pm$ 0.09   | 0.08                 | 0.1            |
| CA2/3/4/DG                       | 53               | 1.21 $\pm$ 0.15 | 1.22 $\pm$ 0.11   | 1.0                  | 0.8            |

Between group differences were assessed using non-parametric Mann-Whitney U-tests and ANCOVAs controlling for education. P values  $<$  0.05 (marginal effects) are in bold and p values  $<$  0.01 are in bold and underlined.

**Supplementary Table S2.** Between-group differences (p-values) in grey matter volume and FDG metabolism in the clusters of interests (shown in Figures 1C and 2C) when comparing the 6 elderly expert meditators and the 67 elderly controls with ANCOVAs correcting for education and all lifestyle measures.

---

| <b>Clusters of interest</b>  | <b>P value</b> |
|------------------------------|----------------|
| MRI-cluster 1: VMPC-ACC      | 0.003          |
| MRI-cluster 2: L TP junction | 0.02           |
| MRI-cluster 3: R TP junction | 0.002          |
| FDG-cluster 1: VMPC-ACC      | 0.0001         |
| FDG-cluster 2: R Insula      | 0.001          |
| FDG-cluster 3: PCC           | 0.007          |

---

**VMPC:** ventromedial prefrontal cortex; **ACC:** anterior cingulate cortex; **TP:** temporo-parietal; **PCC:** posterior cingulate cortex; **L:** left; **R:** right.

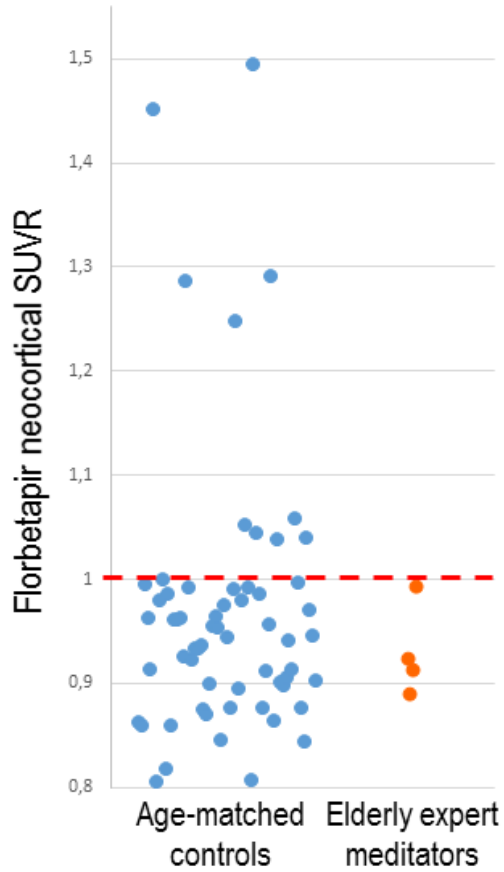

**Supplementary Figure S1.** Plot of the neocortical florbetapir SUVR values in the 51 controls from the elderly control group (blue) and the 4 expert meditators (orange) who had a florbetapir-PET scan. The threshold for A $\beta$ -positivity was determined from Florbetapir-PET data acquired in a group of 41 healthy adults below 40 years old from the IMAP+ study <sup>1,2</sup>.

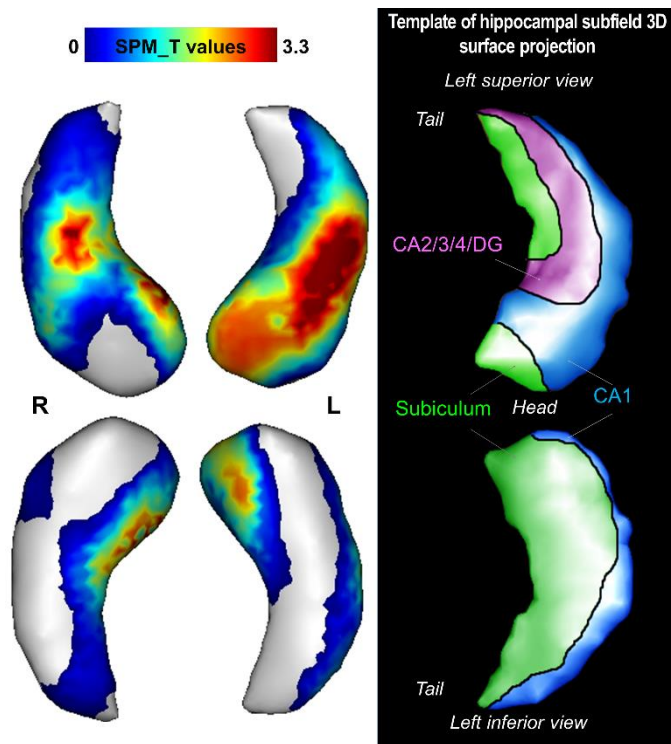

**Supplementary Figure S2. 3D hippocampal surface representation of the one-sample analysis on elderly expert meditators GM volume w-scores maps.** Regions of highest SPM-T values, i.e. where meditators volume w-scores are the most higher than zero when referring to the elderly control group, are indicated in red and mostly corresponds to the left CA1 subfield. A template of the hippocampal subfield topography on the left superior and inferior views of the 3D hippocampal surface is provided for reference (see<sup>3</sup>).

## References

1. Besson, F. L. *et al.* Cognitive and Brain Profiles Associated with Current Neuroimaging Biomarkers of Preclinical Alzheimer's Disease. *J. Neurosci. Off. J. Soc. Neurosci.* **35**, 10402–10411 (2015).
2. La Joie, R. *et al.* Qualitative and quantitative assessment of self-reported cognitive difficulties in nondemented elders: Association with medical help seeking, cognitive deficits, and  $\beta$ -amyloid imaging. *Alzheimers Dement. Amst. Neth.* **5**, 23–34 (2016).
3. Chételat, G. *et al.* Three-dimensional surface mapping of hippocampal atrophy progression from MCI to AD and over normal aging as assessed using voxel-based morphometry. *Neuropsychologia* **46**, 1721–1731 (2008).
